# Supplementary material
Source: HighWire-hosted journal article supplement (https://erj.ersjournals.com/content/54/3/1900281)
Supplement: inline-supplementary-material-1 [file inline-supplementary-material-1.pdf]

## ONLINE SUPPLEMENT

### RESULTS

**Table S1. Baseline characteristics and response to PR in patients with IPF (n=104)**

| Variable                                     | Baseline    | Response to PR      | p-value |
|----------------------------------------------|-------------|---------------------|---------|
| Gender (male: %)                             | 69          | -                   | -       |
| Age (years)                                  | 73 (8)      | -                   | -       |
| FEV <sub>1</sub> /FVC                        | 0.80 (0.07) | 0.0 (-0.02 to 0.01) | 0.34    |
| FVC (L)                                      | 2.3 (0.7)   | 0.0 (0.0 to 0.1)    | 0.11    |
| FVC (% predicted)                            | 74.4 (21.4) | -1.6 (-4.4 to 1.2)  | 0.25    |
| MRC Dyspnoea score                           | 3.1 (1.1)   | -0.7 (-0.9 to -0.5) | <0.01   |
| BMI (kg/m <sup>2</sup> )                     | 27.4 (4.9)  | -0.1 (-0.2 to 0.0)  | 0.15    |
| Smoking status (never / current / former: %) | 47 / 2 / 51 | -                   | -       |
| Oxygen: (%)                                  |             |                     |         |
| Long-term oxygen therapy                     | 7           | -                   | -       |
| Ambulatory oxygen therapy                    | 15          | -                   | -       |
| ISW (m)                                      | 295 (168)   | 58 (42 to 74)       | <0.01   |
| KBILD - Psychological domain                 | 58.0 (16.7) | 6.3 (3.6 to 9.0)    | <0.01   |
| KBILD - Breathlessness and activities domain | 41.4 (16.8) | 5.4 (2.7 to 8.2)    | <0.01   |
| KBILD - Chest symptoms domain                | 66.9 (20.5) | 5.5 (1.7 to 9.2)    | <0.01   |
| KBILD - Total score                          | 55.9 (10.7) | 4.0 (2.3 to 5.7)    | <0.01   |
| CRQ – Dyspnoea domain                        | 16.8 (5.7)  | 4.7 (3.5 to 5.9)    | <0.01   |
| CRQ – Fatigue domain                         | 15.2 (5.4)  | 2.0 (1.0 to 1.9)    | <0.01   |
| CRQ - Emotion domain                         | 33.2 (8.9)  | 2.7 (1.3 to 4.0)    | <0.01   |
| CRQ – Mastery domain                         | 19.7 (5.5)  | 1.4 (0.5 to 2.3)    | <0.01   |
| CRQ – Total score                            | 84.9 (21.0) | 10.8 (7.3 to 14.2)  | <0.01   |

Baseline data are reported as mean (standard deviation) unless stated otherwise. Change data are reported as mean (lower 95% CI to upper 95% CI) change.

*Abbreviations: BMI: Body Mass Index; CI: Confidence Interval; CRQ: Chronic Respiratory Questionnaire; FEV<sub>1</sub>: Forced Expiratory Volume in One Second; FVC: Forced Vital Capacity; ISW: Incremental Shuttle Walk test; IPF: Idiopathic Pulmonary Fibrosis; KBILD: Kings Brief Interstitial Lung Disease questionnaire; MRC: Medical Research Council Dyspnoea score.*
